# Supplementary material for: Genetic stability of the CVS-31 standard sample of Lyssavirus rabies after successive passages in mice: mutations in phosphoprotein and glycoprotein genes
Source: Research Square preprint supplement (doi:10.21203/rs.3.rs-4978823/v1), 2024-09-30
Supplement: Supplementary file 1 [file 1c705746d2fc74f8c2e74ac2.docx]

**TABLES**

**Table 1.** GenBank accession numbers of the *P* and *G* gene sequences used in this study showing the species or organisms from which they were isolated, country, and year in which sample was obtained.

| **GenBank Acession** | **Gene** | **Host** | **Country** | **Year** |
| --- | --- | --- | --- | --- |
| X55727.1 | *P* | Dog passage in BHK-21 | USA | 1990 |
| JX276550.1 | *P* and *G* | Vero Cells | China | 2012 |
| GQ918139.1 | *P* and *G* | Unkown | France | 2009 |
| HM535790.1 | *P* and *G* | Mouse | USA | 2010 |
| KM594034.1 | *P* and *G* | *Nyctinomops laticaudatus* | Brazil | 2010 |
| KM594033.1 | *P* and *G* | *Tadarida brasiliensis* | Brazil | 2010 |
| KM594031.1 | *P* and *G* | *Myotis nigricans* | Brazil | 2010 |
| KM594026.1 | *P* and *G* | *Eptesicus furinalis* | Brazil | 2009 |
| KM594023.1 | *P* and *G* | *Callithrix jacchus* | Brazil | 2008 |
| KM594040.1 | *P* and *G* | *Desmodus rotundus* | Brazil | 2013 |
| KM594039.1 | *P* and *G* | *Cerdocyon thous* | Brazil | 2009 |
| AB517659.1 | *P* and *G* | *Canis lupus familiaris* | Brazil | 2009 |
| MT367573.1 | *G* | Unkown | China | 2018 |
| MN099706.1 | *G* | Mouse | Nigeria | 2017 |
| OP762264.1 | *G* | *Didelphis albeventris*/N2A | Brazil | 2021 |
| OP762225.1 | *G* | *Artibeus literatus/*N2A | Brazil | 2011 |
| OP762206.1 | *G* | *Canis lupus familiaris*/N2A | Brazil | 2011 |
| OR604581.1 | *G* | Dog | Brazil | 2023 |
| OP762199.1 | *G* | *Artibeus literatus*/N2A | Brazil | 2018 |
| KU739045.1 | *G* | Bovine | Brazil | 2011 |
| KM594029.1 | *G* | *Eptesicus furinalis* | Brazil | 2006 |
| KM594042.1 | *G* | *Desmodus rotundus* | Brazil | 2013 |
| AJ506997.1 | *G* | Mouse | India | 2002 |
| KF733452.1 | *G* | BHK-21 | France | 2013 |
| KR105373.1 | *G* | Mice | India | 2015 |
| KR105372.1 | *G* | BHK-21 | India | 2015 |
